## LITHIUM ATTENUATES THE ACTIVE TRANSPORT OF CALCIUM IN THE LARVA OF *AËDES AEGYPTI*

By AMIRAM I. BARKAI

*New York State Psychiatric Institute and Department of Psychiatry,  
College of Physicians and Surgeons, Columbia University, 722 West 168th  
Street, New York, NY 10032, U.S.A.*

AND ROGER W. WILLIAMS

*Division of Tropical Medicine, School of Public Health, College of  
Physicians and Surgeons, Columbia University, 630 West 168th Street,  
New York, NY 10032, U.S.A.*

*Accepted 27 February 1984*

Larvae of the freshwater mosquito *Aedes aegypti* (L.) are able to maintain their principal electrolytes against a steep concentration gradient between the haemolymph and the external medium. The concentration of monovalent ions such as  $\text{Na}^+$ ,  $\text{K}^+$  and  $\text{Cl}^-$  is kept far above that in the external medium by processes of active transport which are located in the anal papillae, the rectum and the Malpighian tubules (Koch, 1938; Ramsay, 1953; Treherne, 1954; Stobbart, 1959, 1960, 1965, 1967). It has been demonstrated that over 90% of the exchange of monovalent ions occurs through the anal papillae (Treherne, 1954), but these organs are not permeable to bivalent ions (Wigglesworth, 1933). The processes which regulate the exchange of bivalent ions between the larva and the external medium have not yet been elucidated. Recently, we have demonstrated that larvae of *Aedes aegypti* maintain a saturable transport system for the uptake of calcium ions from dilute calcium solutions (Barkai & Williams, 1983). This system obeyed Michaelis-Menten kinetics and its activity was susceptible to ruthenium-red which selectively inhibits  $\text{Ca}^{2+}$ -activated ATPase (Watson, Vincenzi & Davis, 1971).

We now present evidence that lithium ions ( $\text{Li}^+$ ) act in a similar manner to that of ruthenium-red in attenuating the accumulation of  $\text{Ca}^{2+}$  from dilute solutions. The net  $\text{Ca}^{2+}$  uptake and the  $\text{Ca}^{2+}$  fluxes were estimated with  $^{45}\text{Ca}$  in early fourth instar larvae. The net  $\text{Ca}^{2+}$  uptake ( $\text{nmol h}^{-1} \text{larva}^{-1}$ ) was determined at  $\text{Ca}^{2+}$  concentrations ranging between 0.01 and 50 mM in the presence and absence of 2 mM-LiCl or 2 mM-NaCl. Calcium fluxes were determined at a concentration of 0.1 mM- $\text{CaCl}_2$  from the curve representing the accumulation of  $^{45}\text{Ca}$  in the larva with time (Barkai & Williams, 1983).

When values for the quantity of  $^{45}\text{Ca}$  in the larva ( $*Q_L$ ) were divided by the concentration of  $^{45}\text{Ca}$  in the medium ( $*Q_M$ ) and plotted against time, the resulting data could be fitted quite closely to the following exponential function of time:

$$*Q_L/*Q_M = [K_{in}/(K_{in} + K_{out})] \cdot [1 - e^{-(K_{in} + K_{out})t}], \quad (1)$$

where  $K_{in}$  and  $K_{out}$  are fractional rate constants for the influx and efflux of calcium respectively. Non-linear regression analysis of the data from control larvae resulted in a mean  $K_{in}$  of  $0.335 \mu\text{l h}^{-1} \text{larva}^{-1}$ , representing the entry of  $33.5 \text{ pmol h}^{-1}$  into an average larva at a  $\text{Ca}^{2+}$  concentration of  $0.1 \text{ mM}$ . The mean value for  $K_{out}$  under these

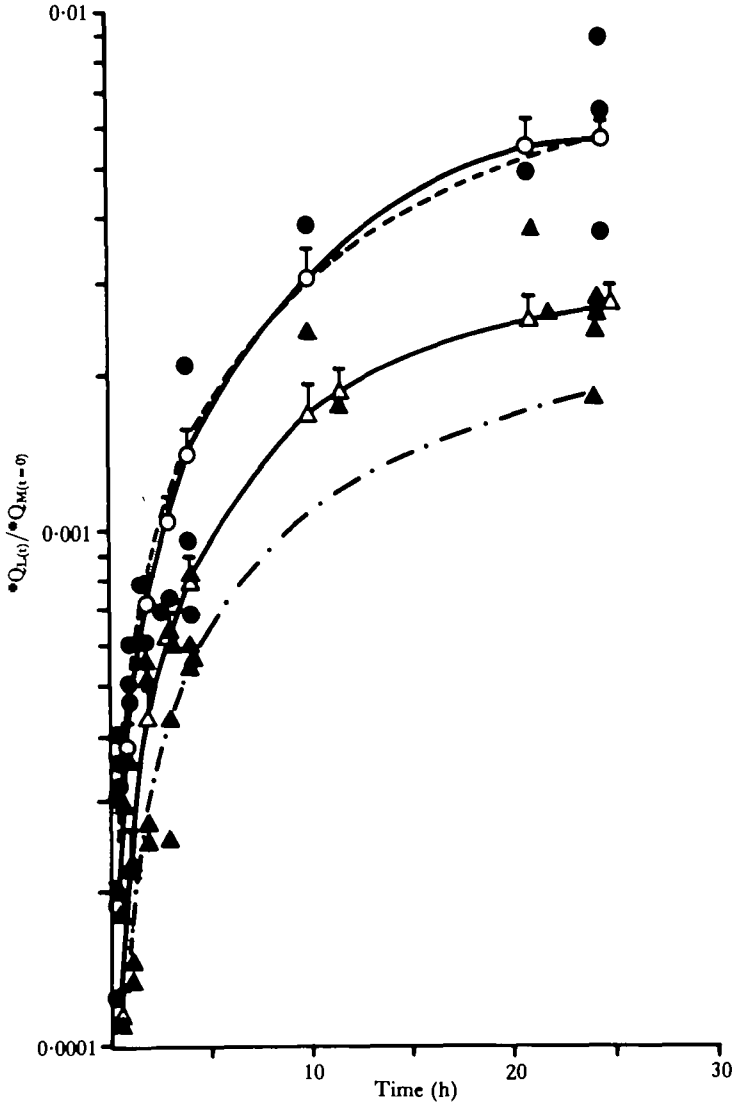

Fig. 1. Change of  $[^{45}\text{Ca}]$  in the larva with time [ $*Q_{L(t)}$ ]. Larvae were placed at time zero in a beaker containing  $0.1 \text{ mM-CaCl}_2$ , a tracer amount of  $^{45}\text{Ca}$ , and either  $\text{NaCl}$  (circles) or  $\text{LiCl}$  (triangles) at a final concentration of  $2 \text{ mM}$ . Data points are depicted as a fraction of  $^{45}\text{Ca}$  in the medium [ $*Q_{M(t=0)}$ ]. Each curve was obtained after fitting of the data to the function presented in equation (1) in the text using a computer programme for non-linear regression analysis. Empty circles or triangles with attached vertical bars represent predicted values and their corresponding standard deviations as produced by the BMDP3R computer programme. Also shown are a control curve (---) and a curve representing  $0.1 \text{ mM}$  ruthenium-red in the external medium (- · - · -) obtained previously (Barkai & Williams, 1983). The fractional rate constants  $K_{in}$  and  $K_{out}$  which were found from these curves according to the theoretical relationship for a closed two compartmental system are presented in Table 1.

Conditions was  $0.027 \text{ h}^{-1} \text{ larva}^{-1}$ , indicating that 0.027 of the readily exchangeable calcium pool in the larva is released into the medium each hour (Barkai & Williams, 1983). When NaCl (2 mM) was present in the external medium there were no significant changes in either  $K_{\text{in}}$  or  $K_{\text{out}}$ , but when the external medium contained LiCl (2 mM), the accumulation of  $^{45}\text{Ca}$  was much slower (Fig. 1). This slower accumulation resulted from both a decrease in  $K_{\text{in}}$  and an increase in  $K_{\text{out}}$  compared to the corresponding control values (Table 1).

The effects of  $\text{Li}^+$  on the saturable transport of calcium were studied in separate

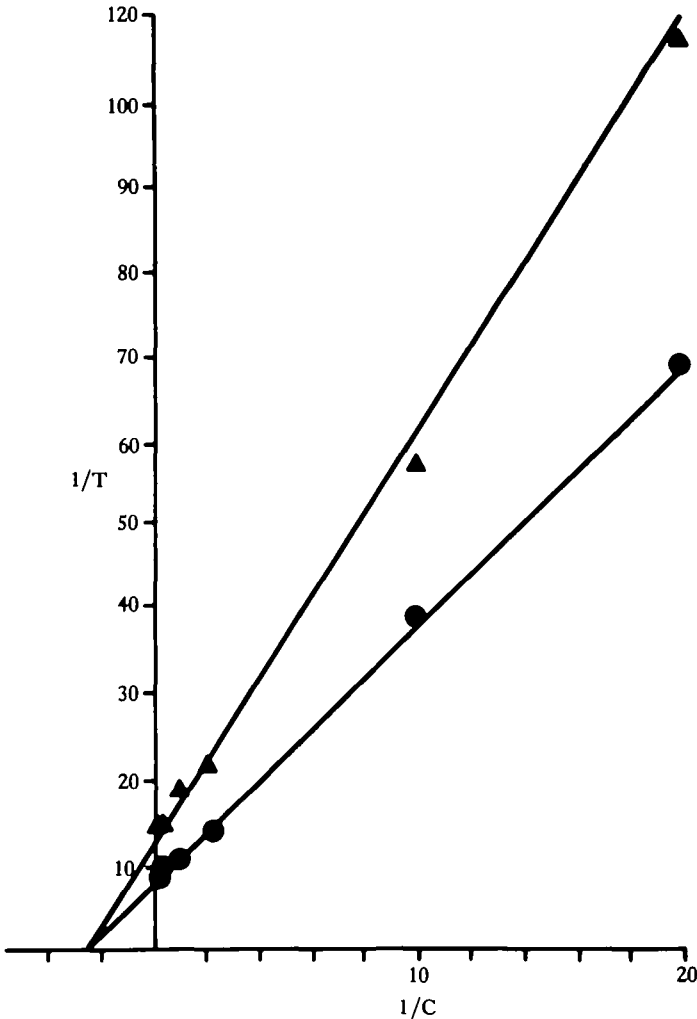

Fig. 2. Kinetic analysis of the saturable transport,  $T$ , as a function of calcium concentration,  $C$ , in the external medium in the presence of 2 mM-NaCl (circles) or 2 mM-LiCl (triangles). Each point is the mean of five or six separate determinations. Intercepts were determined by linear regression analysis using the method of least squares. The affinity constant ( $K_m$ ) of 0.45 mM obtained for both experimental conditions was similar to the  $K_m$  value obtained for controls (Barkai & Williams, 1983). The maximum transport velocity ( $V_{\text{max}}$ ) in larvae exposed to LiCl was  $0.07 \text{ nmol h}^{-1} \text{ larva}^{-1}$ , much slower than the value of  $0.12 \text{ nmol h}^{-1} \text{ larva}^{-1}$  in larvae exposed to 2 mM-NaCl or in control larvae (Barkai & Williams, 1983).

Table 1. *Transfer constants for calcium exchange in Aedes aegypti larvae under various conditions*

| Experimental condition  | $K_{in}^*$<br>( $\mu\text{l h}^{-1} \text{larva}^{-1}$ ) | $K_{out}^*$<br>( $\text{h}^{-1} \text{larva}^{-1}$ ) | Total calcium pool<br>( $\text{nmol larva}^{-1}$ ) |
|-------------------------|----------------------------------------------------------|------------------------------------------------------|----------------------------------------------------|
| Control†                | 0.335 ± 0.077                                            | 0.0266 ± 0.0143                                      | 7.6 ± 0.8                                          |
| NaCl (2 mM)             | 0.037 ± 0.128                                            | 0.0320 ± 0.0171                                      | 8.1 ± 0.6                                          |
| LiCl (2 mM)             | 0.232 ± 0.037†                                           | 0.0708 ± 0.0233†                                     | 6.8 ± 0.7                                          |
| Ruthenium-red (0.1 mM)† | 0.153 ± 0.033†                                           | 0.0668 ± 0.0281†                                     | 5.9 ± 0.6†                                         |

Values are given as means ± 1 s.d.

\* Values for  $K_{in}$  and  $K_{out}$  were obtained after data representing the accumulation of  $^{45}\text{Ca}$  with time were fitted to equation (1) in the text using a computer programme for non-linear regression (BMDP3R, Health Sciences Computing Facility of UCLA in Los Angeles, 1979 revision).

† Data from Barkai & Williams (1983).

‡ Significantly different from corresponding control value ( $P < 0.01$ ).

experiments. The saturable transport was analysed, according to the method of Lineweaver & Burk (1934), in the presence and absence of  $\text{Li}^+$  (2 mM). This analysis revealed that the maximum transport velocity ( $V_{max}$ ) decreased markedly in the presence of LiCl (Fig. 2), a phenomenon which was not observed with NaCl. The apparent affinity constant ( $K_m$ ) was not appreciably different. These results indicate that a marked decrease had occurred in the number of 'calcium carriers' when the larvae were exposed to LiCl and show that  $\text{Li}^+$  may influence carrier sites which are linked to the  $\text{Ca}^{2+}$  pump. The finding that  $\text{Li}^+$  acts to increase  $K_{out}$  and decrease  $K_{in}$  in a manner similar to that of ruthenium-red (Table 1) suggests that  $\text{Li}^+$  influences two independent processes; one is the absorption of  $\text{Ca}^{2+}$  from dilute solutions into the larva and the other is the prevention of  $\text{Ca}^{2+}$  loss to the medium. The entry of  $\text{Ca}^{2+}$  is most likely to occur through the gut, whereas  $\text{Ca}^{2+}$  loss occurs in the urine. Lithium may therefore interfere with the action of calcium pumps which are located in both the gut and the rectum. The calcium pumps in the gut act to enhance the entry of  $\text{Ca}^{2+}$  from the swallowed medium, and therefore inhibition of their activity is expected to result in a lower  $K_{in}$ . In contrast, the calcium pumps in the rectum act to reabsorb  $\text{Ca}^{2+}$  that has been excreted in the urine by the Malpighian tubules, and therefore inhibition of their activity might be expected to result in a higher  $K_{out}$ .

Effects of  $\text{Li}^+$  on  $\text{Ca}^{2+}$  transport are of some importance in biological psychiatry in view of the therapeutic role of  $\text{Li}^+$  in the treatment of affective disorders (Shopsin & Gershon, 1978). Although  $\text{Li}^+$  is widely used in psychiatry, its mode of action has not yet been elucidated. It has been suggested that  $\text{Li}^+$  acts at the presynaptic membrane, preventing release of biogenic amines and facilitating their uptake (Bunney, Gershon, Murphy & Goodwin, 1972), probably by inhibiting the action of  $\text{Ca}^{2+}$  on the presynaptic membrane (Katz & Kopin, 1968), but direct evidence for the antagonism between  $\text{Li}^+$  and  $\text{Ca}^{2+}$  is still obscure. The uptake of  $\text{Li}^+$  into rat cerebral cortex slices has been shown to be inversely related to the concentrations of  $\text{Ca}^{2+}$  in the medium (Wraae, Hillman & Round, 1976). Recent studies with red blood cells indicated that  $\text{Li}^+$  and  $\text{Ca}^{2+}$  may share the same transport system (Meltzer, 1979), thus implying that the therapeutic effects of  $\text{Li}^+$  in certain affective disorders may be associated with changes in calcium transport.

The present findings that  $\text{Li}^+$  but not  $\text{Na}^+$  inhibits the active transport of  $\text{Ca}^{2+}$  in the mosquito larva is consistent with the observation that  $\text{Li}^+$  efflux is linked to the operation of  $\text{Ca}^{2+}$  pumps in the red blood cell (Meltzer, 1979) and suggests that larvae of *Aedes aegypti* provide a useful and convenient model to study the effects of  $\text{Li}^+$ , or other agents, on the saturable system for the active transport of calcium.

## REFERENCES

- BARKAI, A. I. & WILLIAMS, R. W. (1983). The exchange of calcium in larvae of the mosquito *Aedes aegypti*. *J. exp. Biol.* **104**, 139–148.
- BUNNEY, W. E., JR., GERSHON, E. S., MURPHY, D. L. & GOODWIN, R. K. (1972). Psychobiological and pharmacological studies of manic depressive illness. *J. Psychiat. Res.* **9**, 207–226.
- KATZ, R. I. & KOPIN, S. J. (1968). Release of  $^3\text{H}$ -norepinephrine and  $^3\text{H}$ -serotonin evoked from brain slices by electrical field stimulation-calcium dependency and the effects of lithium, ouabain and tetrodotoxin. *Biochem. Pharmacol.* **18**, 1835–1839.
- KOCH, H. J. (1938). The absorption of chloride ions by the anal papillae of diptera larvae. *J. exp. Biol.* **15**, 156–160.
- LINWEAVER, H. & BURK, D. (1934). The determination of enzyme dissociation constants. *J. Am. chem. Soc.* **56**, 658–666.
- MELTZER, H. L. (1979). The effect of ruthenium red and NEM on lithium efflux from human erythrocytes. *Psychopharmac.* **64**, 25–30.
- RAMSAY, J. A. (1953). Exchange of sodium and potassium in mosquito larvae. *J. exp. Biol.* **30**, 79–89.
- SHOPSIN, G. & GERSHON, S. (1978). Lithium: clinical considerations. In *Handbook of Psychopharmacology*, (eds L. Iversen, S. Iversen & S. Snyder), pp. 275–325. New York: Plenum Press.
- STOBBART, R. H. (1959). Studies on the exchange and regulation of sodium in the larva of *Aedes aegypti* (L.). I. The steady state exchange. *J. exp. Biol.* **36**, 641–653.
- STOBBART, R. H. (1960). Studies on the exchange and regulation of sodium in the larva of *Aedes aegypti* (L.). II. The net transport and fluxes associated with it. *J. exp. Biol.* **37**, 594–608.
- STOBBART, R. H. (1965). The effect of some anions and cations upon the fluxes and net uptake of sodium in the larva of *Aedes aegypti* (L.). *J. exp. Biol.* **42**, 29–43.
- STOBBART, R. H. (1967). The effect of some anions and cations upon the fluxes and net uptake of chloride in the larva of *Aedes aegypti* (L.) and the nature of the uptake mechanism for sodium and chloride. *J. exp. Biol.* **47**, 35–57.
- TREHERNE, J. E. (1954). The exchange of labelled sodium in the larva of *Aedes aegypti* (L.). *J. exp. Biol.* **31**, 386–401.
- WATSON, E. L., VINCENZI, F. F. & DAVIS, P. W. (1971).  $\text{Ca}^{2+}$ -activated membrane ATP-ase: selective inhibition of ruthenium-red. *Biochim. biophys. Acta* **249**, 606–610.
- WIGGLESWORTH, V. B. (1933). The effect of salts on the anal gills of the mosquito larva. *J. exp. Biol.* **10**, 1–15.
- WRAAE, O., HILLMAN, H. & ROUND, E. (1976). The uptake of low concentrations of lithium ions into rat cerebral cortex slices and its dependence on cations. *J. Neurochem.* **26**, 835–843.
